# Supplementary material for: Ultrasensitive trace analysis for 2,4,6-trinitrotoluene using nano-dumbbell surface-enhanced Raman scattering hot spots
Source: Royal Society of Chemistry journal article supplement (doi:10.1039/c3an01931d), 2013-12-02
Supplement: c3an01931d.pdf [file c3an01931d.pdf]

## Supporting Information

# Ultrasensitive trace analysis for 2,4,6-trinitrotoluene using nano-dumbbell surface-enhanced Raman scattering hot spots

Zhinan Guo<sup>†a,b</sup>, Joonki Hwang<sup>†a</sup>, Bing Zhao<sup>b</sup>, Jin Hyuk Chung<sup>c</sup>, Soo Gyeong Cho<sup>c</sup>,  
Sung-June Baek<sup>d</sup>, Jaebum Choo<sup>a,\*</sup>

<sup>a</sup>*Department of Bionano Engineering, Hanyang University, Ansan 426-791, South Korea*

<sup>b</sup>*State Key Laboratory of Supramolecular Structure and Materials, Jilin University, Changchun 130012, China*

<sup>c</sup>*Defense Advanced R&D Institute, Agency for Defense Development, Daejeon 305-152, South Korea*

<sup>d</sup>*Department of Electronics Engineering, Chonnam National University, Gwangju 500-757, South Korea*

Submitted to

***Analyst (Revised)***

November 2, 2013

Type of Manuscript: Research Paper

**†Joint first authors**

**\*Corresponding author**

**Address for correspondence:**

**Jaebum Choo**

Tel.: +82-31-400-5201; fax: +82-31-436-8188; e-mail: [jbchoo@hanyang.ac.kr](mailto:jbchoo@hanyang.ac.kr) (J. Choo)

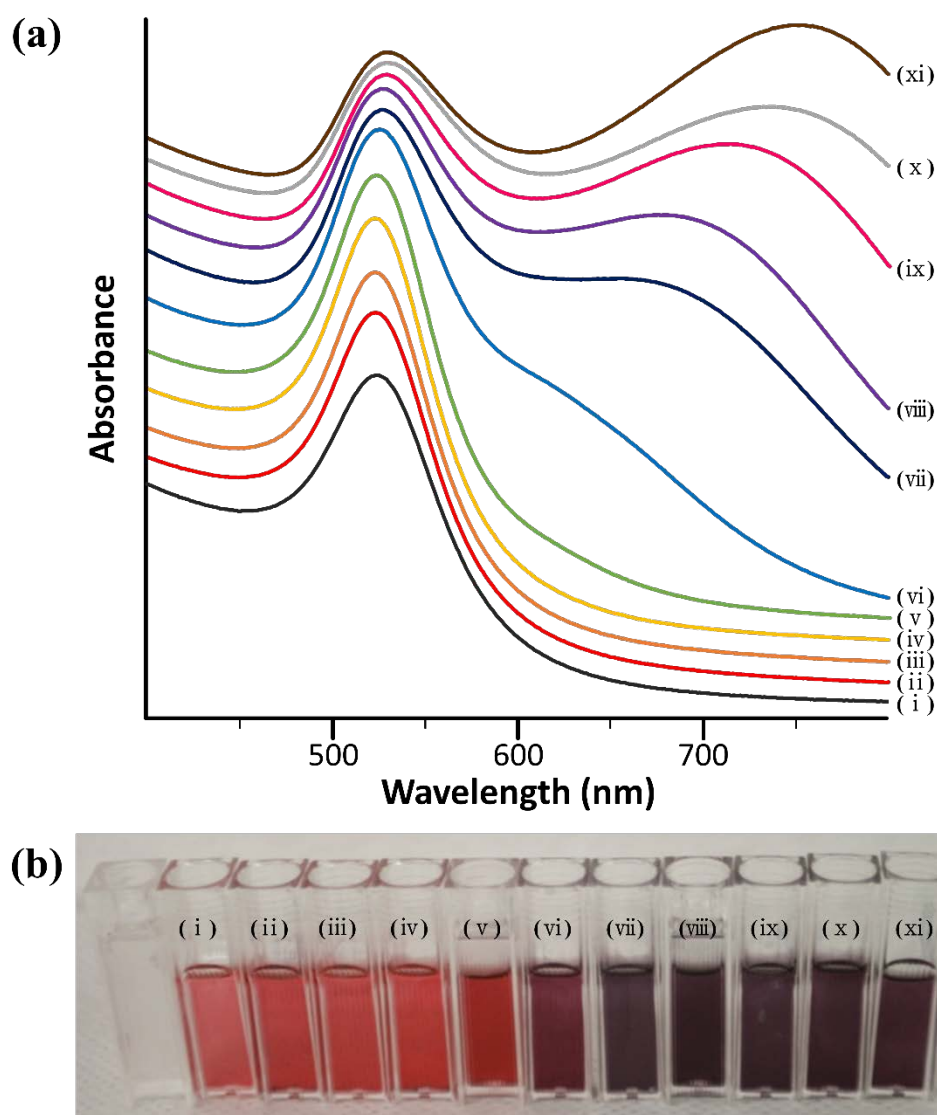

**Fig. S1.** (a) UV/Vis absorption spectra and (b) corresponding photographs of positively charged gold nanoparticle colloids for different concentrations of 4-MPY: (i) gold nanoparticles only, (ii)  $1 \times 10^{-3}$  M, (iii)  $2 \times 10^{-3}$  M, (iv)  $3 \times 10^{-3}$  M, (v)  $4 \times 10^{-3}$  M, (vi)  $5 \times 10^{-3}$  M, (vii)  $6 \times 10^{-3}$  M, (viii)  $7 \times 10^{-3}$  M, (ix)  $8 \times 10^{-3}$  M, (x)  $9 \times 10^{-3}$  M and (xi)  $10 \times 10^{-3}$  M.

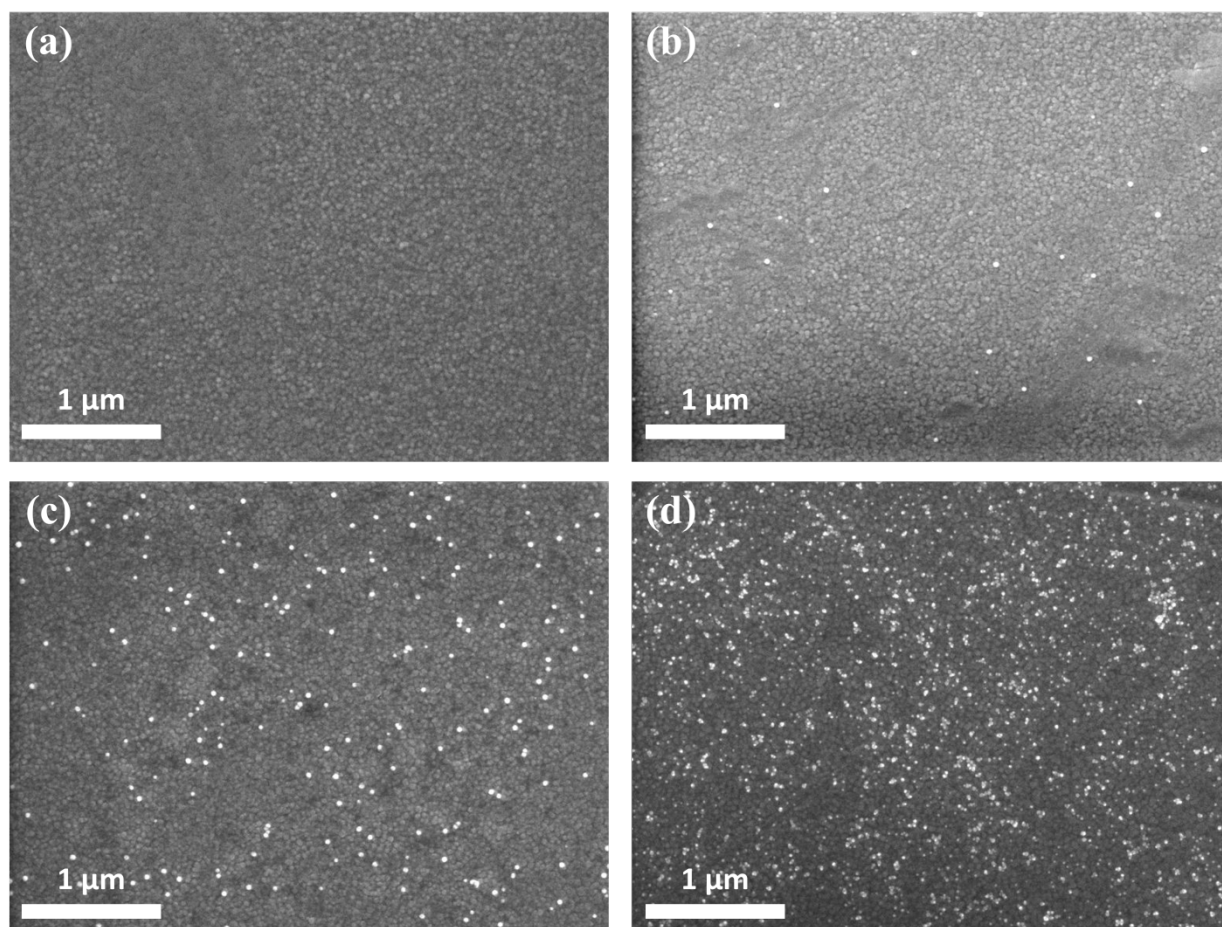

**Fig. S2.** SEM images for (a) bare gold substrate, (b) positively charged nanoparticle-immobilized gold substrate without TNT (negative control), (c) positively charged gold nanoparticle immobilized gold substrate with  $10^{-9}$  M TNT solution, and (d) nano-dumbbell immobilized gold substrate.
